## Historical biogeography of New World Killifishes (Cyprinodontiformes: Funduloidea) recapitulates geographical history in the Gulf of México watershed

SONIA G. HERNÁNDEZ<sup>1,2</sup>, CHRISTOPHER W. HOAGSTROM<sup>3</sup> and WILFREDO A. MATAMOROS<sup>1,2,\*</sup>

<sup>1</sup>Programa de Licenciatura, Instituto de Ciencias Biológicas, Universidad de Ciencias y Artes de Chiapas.

Libramiento Norte Poniente No.1150, Colonia Lajas Maciel, C.P. 29039. Tuxtla Gutiérrez, Chiapas, México

<sup>2</sup>Maestría en Ciencias en Biodiversidad y Conservación de Ecosistemas Tropicales, Instituto de Ciencias Biológicas, Universidad de Ciencias y Artes de Chiapas, Tuxtla Gutiérrez, Chiapas, México.

<sup>3</sup>Department of Zoology, Weber State University, 1415 Edvalson, Ogden, Utah, USA.

\*Corresponding author. E-mail: [wilmamoros@yahoo.com](mailto:wilmamoros@yahoo.com)

Correspondence: Wilfredo A. Matamoros, Programa de Licenciatura, Instituto de Ciencias Biológicas, Universidad de Ciencias y Artes de Chiapas. Libramiento Norte Poniente No.1150, Colonia Lajas Maciel, C.P. 29039. Tuxtla Gutiérrez, Chiapas, México. Email: [wilmamoros@yahoo.com](mailto:wilmamoros@yahoo.com)

### ABSTRACT

We reconstructed the phylogenetic relationships of superfamily Funduloidea with a synthesis of its biogeographic history. We used DNA sequences from five genes for 135 species, with four fossil calibrations, to generate a time-calibrated phylogeny. We estimated diversification rates, ancestral areas (Nearctic or Neotropical), and ancestral habitat (coastal or upland), for each node. Our results suggest that Funduloidea originated in the Late Cretaceous and diversified from Late Paleocene to present at a uniform rate, except Cyprinodontidae expressed an accelerated rate of speciation ~11.02 Ma. Neither viviparity, marine-to-freshwater transition, consistently accelerated speciation. Funduloidea has a coastal origin, but invaded inland many times. Funduloidea phylogeny indicates, sea-level falls isolate coastal populations, but increase island accessibility and climatic cooling facilitates invasions of temperate species into the tropics. For continental lineages, ancient river drainages accord with lineage distributions, including enigmatic disjunctions in Goodeidae and *Fundulus*. Niche shifts occurred from estuaries to open coasts and from forests to grasslands. Antiquity, adaptability, and dynamic geography can explain Funduloidea diversity. Combined environmental and phylogenetic data unveil the history of the Gulf of México watershed. Phylogeny suggests there was diversification by barrier displacement and coastal speciation pump. Overall, speciation time, transitions to freshwater, dispersal, vicariance, adaptive radiation, and viviparity contributed to total diversification.

ADDITIONAL KEYWORDS: barrier displacement; freshwater–fish paradox; Cyprinodontidae; Cubanichthyidae; Fundulidae; Goodeidae; Profundulidae; reciprocal illumination; speciation pump; speciation rate.

### INTRODUCTION

Historical biogeography attempts to explain how past events produced current species distributions (Gutiérrez-García & Vázquez-Domínguez, 2013; Mastretta-Yanes et al., 2015). Within freshwater fishes, evolution of river-drainage configurations can mediate lineage diversification (e.g., Sidharthan et al., 2020; Cassemiro et al., 2023). Thus, studying phylogenetics of freshwater fishes goes hand in hand with studying geographic evolution. This relation of geology to phylogeny has been termed reciprocal illumination for the ability of these two fields to work together to solidify understanding of species diversification and Earth history (Santos & Capellari, 2009; Waters et al., 2019).

Also of interest in historical biogeography are key events that facilitate diversification. For example, although freshwater fishes appear to have high biodiversity compared to marine fishes (i.e., freshwater-fish paradox, Bloom et al., 2013; Tedesco et al., 2017; McDermott, 2021), recent evidence indicates this is not a general phenomenon and that only certain clades of freshwater fishes (Rabosky, 2020) or certain freshwater habitats (Miller, 2021) sustain accelerated speciation rates. Factors predicted to facilitate lineage diversification include ecological adaptability (Whitehead, 2010; Foster & Piller, 2018), viviparity (Helmstetter et al., 2016), adaptive radiation (Martin &

Wainwright, 2011), and time-for-speciation (García-Andrade et al., 2021). Further, the process of barrier displacement can generate species diversity through fragmentation and recombination of fish populations (Albert et al., 2018). This can take various forms, such as river-drainage rearrangements mediated by tectonics, volcanism, and climate (e.g., Domínguez-Domínguez et al., 2010; Hoagstrom & Osborne, 2021), river captures in quiescent landscapes mediated by fluvial geomorphology (Albert et al., 2018; Val et al., 2022), and alternating sea-levels (Dolby et al., 2018). Cyclical processes like sea-level fluctuation may have reciprocating effects, producing a speciation pump (April et al., 2013; Owens, 2015). A phylogenetic synthesis paired with a review of geological and environmental evidence can identify instances in which these various processes have likely occurred.

Here, we investigate the biogeography of superfamily Funduloidea (Cyprinodontiformes, *sensu* Costa, 1998), a northern clade of New World killifishes that historically included Fundulidae, Goodeidae, and Profundulidae. However, recent phylogenomic studies indicate Cyprinodontidae is sister to Fundulidae (i.e., nested within Funduloidea), while the enigmatic Cubanichthyidae also belongs somewhere within the group (Ghezelayagh et al., 2022; Piller et al., 2022). Funduloidea is interesting because many processes associated with diversification are present. For instance, presence of tropical and temperate lineages implies there were niche shifts between realms. Similarly, presence of coastal and continental lineages implies there were shifts between marine and freshwater ecosystems (Whitehead, 2010). Funduloids also display adaptive radiations (Richards et al., 2021), viviparity (Helmstetter et al., 2016), and coastal dispersal (Dolby et al., 2018). A phylogenetic analysis of this superfamily provides a chance to put these varied processes into a broadened evolutionary context to better understand diversification in fishes.

In this study, we synthesize the biogeography of Funduloidea with an emphasis on early branching, using a newly generated phylogenetic tree. To begin, we look for instances of change in diversification rate to identify evolutionary steps where speciation rate changed (Helmstetter et al., 2016). Next, we conduct ancestral-areas analysis at a coarse scale (Neotropical versus Nearctic) to identify instances of biome switching. Third, we locate transitions from coastal to upland habitats. Fourth, we synthesize these findings with a review linking major branching events within Funduloidea to associated geological and environmental histories. We explore evidence for three factors that are expected to increase speciation rate, (1) adaptive radiation (Martin & Wainwright, 2011), (2) viviparity (Helmstetter et al., 2016), and (3) transition to freshwater (Bloom et al., 2013), and we assess whether speciation is faster in freshwater. This synthesis advances evolutionary studies within the superfamily, provides insight into broader evolutionary hypotheses, and illuminates how environmental and geological factors like sea-level fluctuation, river-drainage reorganization, and niche shifts may influence diversification and inland invasion by a euryhaline, coastal taxon.

## MATERIALS AND METHODS

### SEQUENCE DATA

We constructed a Funduloidea phylogeny with data from GenBank (Supporting information, Table S1), including 135 species from a total of 160 recognized species. Outgroups were Atheriniformes (*Atherinomorus stipes*, *Atherinella alvarezii*) and Beloniformes (*Petalichthys capensis*, *Hemiramphus balao*). Data included two nuclear genes (recombination activating gene (RAG1), glycosyltransferase gene (Glyt)) and three mitochondrial genes (cytochrome b gene (Cytb), cytochrome oxidase 1 gene (COI), and NADH dehydrogenase subunit 2 gene (ND2)) (Table S1). A molecular data matrix was generated for each gene and individually examined and visualized in MEGAX v10.0.5 (Kumar et al., 2018). Sequences were aligned separately under default settings in the MUSCLE (Edgar, 2004) option in MEGAX. Each alignment was visually inspected, trimmed to equivalent sizes, and concatenated into a single matrix (5189 bp, 139 terminals; Supporting information, File S1) in Mesquite v3.61, Maddison & Maddison, 2016). For each gene, we performed a search for adequate nucleotide substitution models in Jmodeltest v2.1.10 (Darriba et al., 2012).

### PHYLOGENETIC ANALYSES

We performed a phylogenetic analysis under Bayesian inference in the program Mr. Bayes v3.2.7 (Ronquist et al., 2012) using the Markov chain Monte Carlo (MCMC) algorithm, run at ten million generations, sampling every 1000 iterations over four simultaneous runs. The analysis was verified to reach 0.01 average standard deviations of split frequencies. Subsequently, convergence was corroborated through Tracer v1.7.1 (Bouckaert et al., 2019). The 50%

majority rule tree was visualized in FigTree v1.4.4 (Rambaut, 2010). The analysis was performed in the CIPRES v3.3 portal (Miller *et al.*, 2010).

#### DIVERGENCE-TIME ESTIMATIONS

We calculated divergence-time estimates to establish a temporal framework (Rutschmann, 2006). We used BEAST2 v2.6.3 (Bouckaert *et al.*, 2019) to produce a time-calibrated phylogeny under Bayesian inference. The results of jModeltest v2.1.2 suggested the GTR model of molecular evolution was most appropriate for each locus (Cytb, COI, ND2, Gyt, RAG1). We opted for a relaxed-clock model assuming different substitution rates under the Speciation-Birth-Death model, which assumes constant speciation and extinction rates (Drummond *et al.*, 2006). We calibrated the tree with four fossils used in previous studies, with priors fitted to a lognormal distribution (Table 1). Ghedotti & Davis (2017) vetted three of these fossils from *Fundulus*. A fourth fossil, †*Empetrichthys erdisi*, comes from the Posey Canyon shale, Peace Valley formation of the Ridge Basin, southern California (Uyeno & Miller, 1962). Uyeno & Miller (1962) cited this as a Pliocene deposit (see also Smith *et al.*, 2002; Webb, 2020). However, the Peace Valley Formation is actually Late Miocene, 8.4-5.0 Ma (Crowell, 2003), which we follow here (Table 1). The Posey Canyon shale member, which holds †*E. erdisi*, is in the upper-middle Peace Valley formation (Link, 2003). We excluded two fossils used in recent studies. First, although Helmstetter *et al.* (2016) included “†*Cyprinodon breviradius*”, we did not because its identity and age are unclear (Smith *et al.*, 2002; Echelle & Echelle, 2020). Second, although Webb *et al.* (2004) and Pérez-Rodríguez *et al.* (2015) included †*Tapatia occidentalis*, their phylogenetic placements were inconsistent. Upon review, we chose to exclude it because its position within Goodeidae is unknown (Smith, 1980; Guzmán, 2010). The divergence-time estimation analysis ran the Markov chain Monte Carlo (MCMC) for 50 million generations, sampled every 1000 generations in BEAST2 v2.5 (Bouckaert *et al.*, 2019). To evaluate convergence and effective sample size (>200), we employed Tracer v1.7.1 (Rambaut *et al.*, 2018) and used LogCombiner v2.6.3 (Bouckaert *et al.*, 2019) to combine the replicates, discarding the first 25% of burns for each execution. Finally, we used TreeAnnotator v2.6.3 (Bouckaert *et al.*, 2019) to obtain a maximum-clade-credibility tree.

**Table 1.** Fossils used in molecular dating analysis as calibration points in chronological order. Included taxa at each calibration point and prior parameters: mean, standard deviation (S) and offset. Fossils are from Ghedotti & Davis (2017) and Uyeno & Miller (1962). Dates for *Empetrichthys erdisi* are for the Peace Valley formation (Ridge Basin, Southern California; Ensley & Verosub, 1982), which includes the Posey Canyon shale (Link, 2003), where *E. erdisi* occur (Uyeno & Miller, 1962). From each age range, our analysis used the youngest age (in bold) as a hard minimum (Parham *et al.*, 2012).

| Fossil                      | Age<br>Ma   | Included taxa                | Source                   | Mean | S    | Offset |
|-----------------------------|-------------|------------------------------|--------------------------|------|------|--------|
|                             |             | <i>Fundulus zebrinus</i>     | (Ghedotti & Davis, 2017) |      |      |        |
| <i>Fundulus detillae</i>    | <b>2.6</b>  | <i>Fundulus kansae</i>       | (Ghedotti & Davis, 2017) | 0.47 | 0.1  | 1.0    |
|                             |             | <i>Fundulus lima</i>         | (Ghedotti & Davis, 2017) |      |      |        |
| <i>Fundulus nevadensis</i>  | <b>8.03</b> | <i>Fundulus parvipinnis</i>  | (Ghedotti & Davis, 2017) | 1.95 | 0.1  | 1.0    |
|                             |             | <i>Fundulus grandis</i>      | (Ghedotti & Davis, 2017) |      |      |        |
|                             |             | <i>Fundulus grandissimus</i> | (Ghedotti & Davis, 2017) |      |      |        |
|                             |             | <i>Fundulus heteroclitus</i> | (Ghedotti & Davis, 2017) |      |      |        |
|                             |             | <i>Fundulus confluentus</i>  | (Ghedotti & Davis, 2017) | 2.72 | 0.07 | 1.0    |
|                             |             | <i>Fundulus pulvereus</i>    | (Ghedotti & Davis, 2017) |      |      |        |
| <i>Fundulus lariversi</i>   | <b>16.2</b> | <i>Fundulus jenkinsi</i>     | (Ghedotti & Davis, 2017) |      |      |        |
| <i>Empetrichthys erdisi</i> | <b>5</b>    | <i>Empetrichthys latos</i>   | (Warren & Brooks, 2020)  | 1.39 | 0.07 | 1.0    |

#### DIVERSIFICATION-THROUGH-TIME

To estimate diversification rates, we used the BAMM v2.5.0 R package (Rabosky *et al.*, 2014), which estimated speciation and extinction rates from the BEAST2 tree. To acquire parameters for analysis, we generated prior values in the R package BAMMtools 2.0 (Rabosky *et al.*, 2014), using setBAMMpriors. The file obtained was then executed in BAMM. We ran four independent chains with five million generations, sampling every 1,000 to ensure convergence. Subsequently, we corroborated convergence of the log-likelihood effective sample sizes and stationarity using BAMMtools with the R package coda v016-1 (Plummer *et al.*, 2006). We discarded the first 10% of the samples as burnin and calculated diversification-rate-shift settings with 95% credibility using the CredibleShifSet function. To obtain the best change configuration with maximum posterior probability, we used the getBestConfiguration function. We plotted speciation rates over time with the plotRateThroughTime function to generate lineage-through-time (LTT) plots using 'PlotRateThroughTime' for each family (excluding Cubanichthyidae, which has only two species).

#### ANCESTRAL-AREAS RECONSTRUCTION

Reconstruction of ancestral areas infers likely distributions of ancestors based on contemporary distributions and phylogenetic relationships (Joy *et al.*, 2016). We reconstructed ancestral ranges in RASP v4 (Yu *et al.*, 2020) using six statistical models, including (1) Statistical Dispersal-Vicariance (DIVALIKE) in which speciation by vicariance is given primacy while dispersal and extinction are minimized (Yu *et al.*, 2010); (2) Dispersal Extinction and Cladogenesis (DEC) which allows more ways for widespread ranges to be subdivided and inherited than just by vicariance (Beaulieu *et al.*, 2013); and (3) BAYAREALIKE which only allows range copying (daughter lineages share their ancestral area, Garcia-R & Matzke, 2021). In addition, each of these models was used with a modification to include potential for long-distance (i.e., jump) dispersal (+J) (Matzke, 2014); (4) DIVALIKE+J, (5) DEC+J, and (6) BAYAREALIKE+J (Garcia-R & Matzke, 2021). We used 1,000 randomly sampled post-burn-in trees from the BEAST analyses results as input. We assigned species between Nearctic and Neotropical realms (Fig. 1). The boundary between realms was the Trans-Mexican Volcanic Belt (Rico *et al.*, 2022). We used sample-size corrected Akaike weights (AIC<sub>c</sub>) to compare fitness among models (Garcia-R & Matzke, 2021).

#### ANCESTRAL-HABITAT RECONSTRUCTION

To document the evolution of habitat affiliation, we used the make.simmap function in R (R Development Core Team, 2021), using the Phytools package (Revell, 2012). This procedure fits a continuous-time reversible Markov model for the evolution of a character, using a simulated model and tree-tip designations by species to simulate stochastic character histories (Revell, 2012). The procedure was performed with 1000 stochastic character histories simulations, choosing the equal-rates model, which assumes that a trait is acquired or lost under the same probabilities over time (Passarotto *et al.*, 2018). Habitat data for each species were obtained from literature, classified as: (1) coastal species occurring inland only within the coastal plain physiographic province (Fig. 1), (2) upland species of inland physiographic regions above the coastal plain, and (3) species with combined coastal-upland distributions (Supporting information, Table S2).

## RESULTS

### PHYLOGENETIC ANALYSES

The Mr. Bayes and BEAST produced similar topologies. Bayesian inference recovered almost all genera with posterior probabilities >0.95 (Fig. 2; Table 2). Most genera were monophyletic except (1) *Xenotoca variata* was sister to *Ameca splendens*, (2) *Girardinichthys turneri* was sister to remaining *Girardinichthys* plus *Neotoca* and *Skiffia*, and (3) *Jordanella pulchra* was sister to *Floridichthys* while *J. floridae* was sister to *Megupsilon-Cyprinodon*. Congruent with genomic results (Ghezelayagh *et al.*, 2022; Piller *et al.*, 2022), our results indicate Cyprinodontidae is within Funduloidea, sister to Fundulidae (Cyprinodontidae + Fundulidae, PP >0.95) and *Cubanichthys* is sister to Profundulidae + Goodeidae.

**Table 2.** Divergence estimates with confidence intervals (CIs) for numbered chronogram nodes (Fig. 2) that are evaluated in this study. Environmental events potentially associated with phylogenetic divergences (reciprocal illumination) are provided. Further description is provided in text with references.

| Node | Divergence (node)                                         | Age estimate (MA)<br>(95% HPD CI) | Reciprocal illumination                                                                                                                                                                                                                                       |
|------|-----------------------------------------------------------|-----------------------------------|---------------------------------------------------------------------------------------------------------------------------------------------------------------------------------------------------------------------------------------------------------------|
| 1    | Funduloidea split Neotropics / Nearctic                   | <b>61.76</b><br>(48.53-76.99)     | 59.2-47.8 Ma – Tropic of Cancer retracted to 27°N (Nearctic-Neotropical subdivision)<br>55.8-55.0 Ma – Gulf of México drawdown (coastal barriers)                                                                                                             |
| 2    | Fundulidae / Cyprinodontidae                              | <b>55.09</b><br>(45.10-72.34)     | 55.8-55.0 Ma – Gulf of México drawdown (coastal barriers)<br>55.5 Ma – North American drainage reorganization (coastal barriers, niche shift)                                                                                                                 |
| 3    | Goodeidae-Profundulidae / Cubanichthyidae                 | <b>55.94</b><br>(43.07-70.49)     | 66.0-56.0 Ma – Gulf-Caribbean seaway (dispersal between seas)<br>55.8-55.0 Ma – Gulf of México drawdown (continental barriers)                                                                                                                                |
| 4    | Goodeidae / Profundulidae                                 | <b>37.76</b><br>(27.81-48.44)     | 40.0-25.0 Ma – Chiapas Massif uplift (inland drainage capture, Profundulidae)<br>38.5-33.9 Ma – Madrean River isolated from Gulf (inland drainage capture, Goodeidae)<br>33.9-27.8 Ma – Tropic of Cancer retracted to 25°N (Nearctic-Neotropical subdivision) |
| 5    | <i>Profundulus</i> / <i>Tlaloc</i>                        | <b>28.33</b><br>(19.65-37.42)     | 35.0-25.0 Ma – Erosion of Chiapas Massif foreland (river capture)<br>30.0-25.0 Ma – Northern Chiapas Massif uplift (river capture)                                                                                                                            |
| 6    | Empetrichthyinae / Goodeinae                              | <b>21.15</b><br>(15.61-27.02)     | 23.0 Ma – North American drainage reorganization, Great Basin tectonism (range fragmentation)                                                                                                                                                                 |
| 7    | Characodontini-Ilyodontini / Goodeinae                    | <b>14.15</b><br>(10.58-17.96)     | 14.0-5.0 Ma – San Marcos Fault reactivation (range fragmentation)<br>13.6-10.6 Ma – Los Encinos volcanism (San Luis Potosí) (range fragmentation)<br>12.0 Ma – Metates Volcanism (Durango) (range fragmentation)                                              |
| 8    | Cyprinodontidae / <i>Jordanella pulchra-Floridichthys</i> | <b>39.96</b><br>(28.54-52.27)     | 47.8-33.9 Ma – Middle-Late Eocene cooling (dispersal into tropical Yucatán)                                                                                                                                                                                   |
| 9    | <i>Cyprinodon-Megupsilon-Jordanella</i> / <i>Cualac</i>   | <b>26.73</b><br>(18.49-35.66)     | 32.1-17.6 Ma – Sea-level falls (coastal barriers)<br>27.8-16.0 Ma – Late Oligocene-Early Miocene Chicontepec Basin uplift (inland drainage capture)                                                                                                           |
| 10   | <i>Jordanella floridae</i> / <i>Megupsilon-Cyprinodon</i> | <b>19.26</b><br>(12.65-26.20)     | 23.0 Ma – Sea-level fall (dispersal to Ocala High)<br>18.0 Ma – Coastal flooding (island barrier)<br>17.0-13.8 Ma – Middle Miocene Climatic Optimum (island barrier)                                                                                          |
| 11   | <i>Megupsilon</i> / <i>Cyprinodon</i>                     | <b>11.02</b><br>(7.68-14.84)      | 11.8 Ma – Development of Río San Fernando (dispersal inland)                                                                                                                                                                                                  |
| 12   | <i>Cyprinodon</i> / Yucatán <i>Cyprinodon</i>             | <b>7.28</b><br>(5.40-9.30)        | 11.6-5.3 Ma – Uplift of Yucatán Peninsula (continental barrier)                                                                                                                                                                                               |
| 13   | Fundulidae / <i>Leptolucania</i>                          | <b>43.69</b><br>(33.62-54.22)     | 43.6-40.8 Ma – Sea-level falls (dispersal to Ocala High)<br>40.1 Ma – Sea-level rise (island barrier)                                                                                                                                                         |
| 14   | <i>Fundulus</i> / <i>Lucania</i>                          | <b>43.69</b><br>(27.38-42.76)     | 33.9-33.7 Ma – Sea-level fall (coastal barrier)                                                                                                                                                                                                               |
| 15   | <i>Fundulus</i> / <i>Wileyichthys</i>                     | <b>31.79</b><br>(25.15-38.92)     | 38.5-23.0 Ma – Ancestral Río Grande (dispersal inland)<br>34.0-28.0 Ma – Volcanism (range fragmentation)                                                                                                                                                      |
| 16   | <i>Fundulus</i> main split                                | <b>26.77</b><br>(21.6-32.1)       | 32.1-17.6 Ma – Sea-level falls (coastal barriers)                                                                                                                                                                                                             |

26.0 Ma – Hackberry Embayment (coastal barriers)

|    |                                                                                      |                               |                                                             |
|----|--------------------------------------------------------------------------------------|-------------------------------|-------------------------------------------------------------|
| 17 | <i>Fundulus</i> / <i>Fundulus majalis</i> - <i>F. persimilis</i> - <i>F. similis</i> | <b>22.38</b><br>(18.23-23.80) | 23.0 Ma – Houston-Brazos estuary abandoned (niche shift)    |
| 18 | <i>Zygonectes</i> / <i>F. sciadicus</i> - <i>Plancterus</i>                          | <b>22.12</b><br>(17.37-27.14) | 23.0 – Emergence of North American grasslands (niche shift) |

#### DIVERSIFICATION-THROUGH-TIME

The LTT plots (Fig. 3), indicate Cyprinodontidae is the only family that experienced a diversification-rate shift, initiating ~11.02 Ma and continuing to present ( $\lambda = 0.18$  mean; range = 0.08-0.43). Initial rate increase occurred when *Megupsilon* diverged from *Cyprinodon*. No shifts were detected in Fundulidae ( $\lambda = 0.07$  mean; range = 0.03-0.18), Goodeidae ( $\lambda =$  mean 0.15; range = 0.06-0.38), or Profundulidae ( $\lambda =$  mean 0.12; range = 0.02-0.36).

#### ANCESTRAL-AREAS RECONSTRUCTION

The best-fit model for ancestral-areas reconstruction was the BAYAREALIKE+J (Supporting information, Table S3, consistent with the coarse level of analysis, which recognized only the Nearctic and Neotropical realms. Most divergence events occurred within one realm or the other, as required by the BAYAREALIKE model (Garcia-R & Matzke, 2021). Inclusion of the +J portion of the model implies that niche shifts between realms occurred via long-distance dispersal (Matzke, 2014).

The ancestral distribution for Funduloidea is optimized as Nearctic-Neotropical, suggesting a widespread most recent common ancestor (MRCA) (Fig. 4). Funduloidea first split into a northern fork with primarily Nearctic affinities (Fundulidae-Cyprinodontidae) and southern fork with Nearctic-Neotropical affiliation (Cubanichthyidae, Profundulidae, Goodeidae). Appearance of fundulids in the Neotropics is relatively recent (Late Neogene-Quaternary), limited to the *Fundulus grandis* species group. Nearctic Cyprinodontidae made several Neotropical invasions (*Floridichthys*, Yucatán *Cyprinodon*, Caribbean *Cyprinodon*, *C. variegatus* species group). The MRCAs of Cubanichthyidae and Profundulidae were Neotropical and both families are restricted to that realm. Goodeidae most likely had a Nearctic origin, with representatives of *Girardinichthys*, *Allodontichthys*, *Xenotaenia*, and *Ilyodon* reaching Neotropical drainages in the Late Neogene-Quaternary.

#### ANCESTRAL-HABITAT RECONSTRUCTION

The ancestral-habitat reconstruction (Fig. 5) indicates that the MRCA of Funduloidea was coastal. Inland invasions within Fundulidae include *Lucania interioris*, the *F. sciadicus*-*Plancterus* group, and later-branching lineages within subgenera *Fundulus* and *Zygonectes*. Fundulidae is the only family with species broadly distributed between coastal and upland habitats. In Cyprinodontidae, *Floridichthys* and *Jordanella* retained coastal affinities while the maritime branch of *Cyprinodon* gave rise to upland and coastal lineages. Other branches within *Cyprinodon* became upland lineages. Cubanichthyidae remained coastal, whereas Profundulidae and Goodeidae originated and diversified entirely in uplands.

#### EARLY BRANCHING IN FUNDULOIDEA

Evidence suggests the MRCA of Funduloidea emerged in the Late Cretaceous Gulf of México, spanning present-day Nearctic and Neotropical realms. The MRCA was likely tropical because the tropics extended to 30° North at this time (Zhang *et al.*, 2019). The MRCA also likely had high salinity tolerance (Ghedotti & Davis, 2013). Cretaceous origin indicates the MRCA survived the Chicxulub meteor impact ~66 Ma. Given extreme impacts of this event (Schulte *et al.*, 2010), it may have been confined to an isolated refugium.

The primary split in Funduloidea, 77.0-48.5 Ma (Fig. 2, node 1), suggests north-south division. The Tropic of Cancer retreated to 27°N by the Early Eocene (Zhang *et al.*, 2019), suggesting the Nearctic MRCA of Fundulidae-Cyprinodontidae (Fig. 4) inhabited the northwestern Gulf Coast. A lack of river deltas for several hundred kilometers south of the Río Grande (Snedden & Galloway, 2019) possibly caused a distributional hiatus of funduloids. The MRCA of Cubanichthyidae-Goodeidae-Profundulidae likely populated the next delta to the south, fed by a large drainage extending northwest along the front of the Sierra Madre (Snedden & Galloway, 2019; henceforth, Madrean River). Evidence suggests the Gulf of México became isolated from the world ocean 55.80-54.95 Ma, accompanied by drawdown 900-1300 m (Cossey *et al.*, 2016, 2021). Because sea-level fall isolates

estuaries (Dolby *et al.*, 2020), this event could have separated northern Fundulidae-Cyprinodontidae from southern Cubanichthyidae-Goodeidae-Profundulidae (Table 2).

Divergence of Cyprinodontidae from Fundulidae, 72.3-45.1 Ma (Fig. 2, node 2), may also result from Gulf of México drawdown (Table 2) along with a ~55.5 Ma reconfiguration of drainages feeding the Gulf of México (Snedden & Galloway, 2019). We suggest ancestral Fundulidae populated the Houston-Brazos River delta, the only fluvial delta then present (Snedden & Galloway, 2019). In contrast, ancestral Cyprinodontidae putatively originated from an ancestor like *C. variegatus* (Echelle & Echelle, 2020), a species well adapted for open coasts with fluctuating temperatures and salinities (Nordlie, 2006). We infer this taxon inhabited the Rosita Delta, which received diffuse freshwater inflow, but was wave-dominated and sandy (Snedden & Galloway, 2019). Gulf drawdown potentially produced extreme salinities (Cossey *et al.*, 2016, 2021), perhaps explaining exceptional tolerance of fluctuating salinities among cyprinodontids.

Divergence of Cubanichthyidae from Goodeidae-Profundulidae, 70.5-43.1 Ma (Fig. 2, node 3), could also link to the Gulf drawdown (Table 2). A Paleocene seaway along the Mexican foreland and across the Yucatán platform (Martens & Sierra-Rojas, 2021) potentially allowed ancestral *Cubanichthys* to reach the Caribbean Sea. Gulf drawdown would have dewatered the seaway, isolating *Cubanichthys* to the east.

Divergence of Goodeidae from Profundulidae, 48.4-27.8 Ma (Fig. 2, node 4), presumably reflects upland isolation of lineages in separate river drainages (Table 2, Fig. 4). The ancestral goodeid likely occupied the Madrean River (Río Bravo in Snedden & Galloway, 2019), which was cut off from the Gulf of México in the Late Eocene (Galloway *et al.*, 2011). By the end of the Eocene, the tropics retreated to 25°N (Zhang *et al.*, 2019), making the Madrean River Nearctic. For Profundulidae, the timing of divergence corresponds with uplift of the Chiapas Massif (40-25 Ma, Villagómez & Pindell, 2020). Drainage from the Massif to the Bay of Campeche was localized at this time, not reaching the Gulf of México basin (Beltrán-Triviño *et al.*, 2021; Villagómez *et al.*, 2022).

#### PROFUNDULIDAE

The major node within Profundulidae, 37.4-19.7 Ma (Fig. 2, node 5), separates *Profundulus* from *Tlaloc*. *Tlaloc* occurs across the Chiapas Massif and adjacent highlands within the Río Grijalva drainage (Miller, 1955; Cashner & Echelle, 2020). Upper Río Grijalva initially flows northwest but makes an abrupt turn northeast, a pattern consistent with capture by a north-flowing river, possibly the ancestral Río Uxpanapa or Tonalá, caused by uplift of the northwestern Chiapas Massif 30-25 Ma (Witt *et al.*, 2012), or head-cutting of the lower Río Grijalva during a period of extensive erosion 35-25 Ma (Abdullin *et al.*, 2016). Divergence of *Tlaloc* from *Profundulus* provides an estimate for timing of this capture (Table 2) and explains the distinctiveness of the Upper Grijalva fish community (Elías *et al.*, 2020). Ancestral *Profundulus* presumably remained west of the Chiapas Massif (ancestral Río Coatzacoalcos). Rising sea levels could explain disappearance of *Profundulus* from Atlantic-slope drainages, as proposed for *Herichthys* (Pérez-Miranda *et al.*, 2020). During the Middle Miocene Climatic Optimum (MMCO), 17.0-13.8 Ma (Miller *et al.*, 2020a), seas inundated areas north and east of the Sierra Madre del Sur and Chiapas Massif (Blakey & Ranney, 2018). Diversification occurred thereafter, possibly from one refugial population.

#### GOODEIDAE

Oligocene transfer of the upper Madrean River to the Río Grande (Galloway *et al.*, 2011; Snedden & Galloway, 2019) allowed Goodeidae to expand westward, along the front of the Sierra Madre Occidental, to the Great Basin. Divergence of Empetrichthyinae 27.0-15.6 Ma (Fig. 2, node 6, Table 2) agrees with breakup of this drainage at the Oligocene-Early Miocene transition (Snedden & Galloway, 2019). Great distance between northern (Empetrichthyinae) and southern (Goodeinae) goodeids is a biogeographic anomaly (Webb, 2020). Parenti (1981) proposed regional desiccation eliminated intervening populations (see also Grant & Riddle, 1995; Webb *et al.*, 2004; Webb, 2020), but living Empetrichthyinae occupy the driest region of North America (i.e., aridity is associated with survival). Fragmentation of the Madrean River may have been an additional cause of extirpations (Fagan *et al.*, 2002) and climatic cooling may have reduced habitat suitability at higher elevations and latitudes, perhaps explaining why Empetrichthyinae associates with warmwater springs. It is also possible remnant goodeid populations were present in the uninhabited region during European settlement, but disappeared due to habitat destruction, dewatering, or invasive species associated with European contact. Because this scenario agrees with reconstructed hydrography, it is unnecessary to invoke the popular hypothesis (Minckley *et al.*, 1986; Grant &

Riddle, 1995; Miller *et al.*, 2005; Webb, 2020) that northward drift of the Pacific Plate created the gap between Empetrichthyinae and Goodeidae.

The hypothesis that Goodeidae used a western route from the Great Basin into central México (Pérez-Rodríguez *et al.*, 2015) requires modification because Goodeidae dispersing from the Gulf of México would have reached central México en route to the Great Basin. Complex geological history confounds understanding of Middle Miocene hydrology, but reactivation of the San Marcos Fault, 14-5 Ma and Middle Miocene volcanism on the northwest and eastern borders of the Mesa Central (Aranda-Gómez *et al.*, 2007; Chávez-Cabello *et al.*, 2007; Nieto-Samaniego *et al.*, 2007), potentially disrupted the Madrean River. Divergence of Characodontini-Ilyodontini, 18.0-10.6 Ma (Fig. 2, node 7), appears to have been an east-west divergence (possibly between ancestral ríos Nazas and Aguanaval, Table 2). Loss of Goodeids from the Gulf of México drainage could reflect Late Miocene integration of the ancestral Río Nazas with the Río Grande, which facilitated an influx of fishes (Hoagstrom & Osborne, 2021). *Characodon* persisted only in remote basins (†*C. garmani*, Mayran-Parras Basin; *C. audax-C. lateralis*, Río Tunal (Beltrán-López *et al.*, 2021), potentially protected from invading fishes. Positioning of Goodeinae on the TMVB throughout its tectonic evolution, which lasted 17 my (Ferrari *et al.*, 2012), the lineage experienced frequent drainage reorganizations and shifting hydrographic barriers (Barbour, 1973; Domínguez-Domínguez *et al.*, 2010; Pérez-Rodríguez *et al.*, 2015). Stream capture was likely the main mode of range expansion and diversification (Webb *et al.*, 2004; Domínguez-Domínguez *et al.*, 2010; Beltrán-López *et al.*, 2021).

#### CYPRINODONTIDAE

From Middle to Late Eocene, the estuary of the Madrean River disappeared, a wave-dominated shore zone developed (Snedden & Galloway, 2019), and the climate cooled (Zachos *et al.*, 2001; Miller *et al.*, 2020b). These conditions potentially favored southward invasion by Cyprinodontidae, following the into-the-tropics paradigm (Meseguer & Condamine, 2020). Divergence of *Jordanella pulchra-Floridichthys*, 52.3-28.5 Ma (Fig. 2, node 8, Table 2), implies Cyprinodontidae inhabited the southwestern Gulf by the Late Eocene. Possibly, this invasion displaced coastal Goodeidae and Profundulidae, leaving only inland populations discussed above.

Because living *Floridichthys* have a disjunct distribution across the Gulf of México, the MRCA could be from Florida or Yucatán. Presence of the sister taxon *Jordanella pulchra* in Yucatán favors that scenario and is compatible with the hypothesis (above) that Cyprinodontidae originated in the Early Eocene Rosita Delta (closer to Yucatán than Florida). Further, the Caribbean-Loop Current could have facilitated later oceanic dispersal of *Floridichthys* from Yucatán to Florida. Hence, we suggest the Late Eocene ancestor of *J. pulchra-Floridichthys* dispersed along the western Gulf Coast to the Bay of Campeche where coastal and shallow-marine habitats (Villagómez *et al.*, 2022) provided suitable habitats. However, *J. pulchra-Floridichthys* has uncertain phylogenetic placement (compare Fig. 2 with Piller *et al.*, 2022), so further study is needed.

Endemism of *Cualac tessellatus* in the Río Pánuco, 35.7-18.5 Ma (Fig. 2, node 9), implies the MRCA inhabited the western Gulf Coast in the Oligocene and ancestral *C. tessellatus* was living within the ancestral Río Pánuco (mapped in Beltrán-Triviño *et al.*, 2021). Late Oligocene-Early Miocene uplift of the Chicotepec Basin (Roure *et al.*, 2009), combined with Oligo-Miocene sea-level falls roughly every 1.2 my (Oi2-Mi1 low stands, 32.1-17.6 Ma, Boulila *et al.*, 2011), may have stranded this population inland (Table 2).

Our phylogeny indicates *Jordanella* is polyphyletic. Separation of *Jordanella floridae* from *Megupsilon-Cyprinodon*, 26.2-12.7 Ma (Fig. 2, node 10), suggests an ancestral cyprinodontid dispersed eastward during the Early Miocene. The Florida Peninsula was an island (i.e., Ocala High) and lowered sea levels reduced the marine gap with the mainland (Popenoe, 1990), possibly facilitating continent-to-island immigration (Table 2). Subsequent coastal flooding 18 Ma (Snedden & Galloway, 2019) and elevated MMCO sea-levels (17.0-13.8 Ma, Miller *et al.*, 2020) could have isolated ancestral *J. floridae* (Table 2).

Late Miocene divergence of *Megupsilon* (14.8-7.7 Ma, Fig. 2, node 11) may represent Late Miocene emergence of ancestral Río San Fernando (Río Bravo in Snedden & Galloway, 2019) as a corridor for inland invasion (Table 2). This species (extinct in the wild) inhabited a springfed system (Miller *et al.*, 2005), and may have speciated as a spring endemic. It is possible episodes of aridity, tectonism, or volcanism isolated the spring system, but this needs further study.

Yucatán *Cyprinodon* descend from the first diverging lineage of the genus (9.3-5.4 Ma, Fig. 2, node 12). Emergence of the peninsula in the Late Miocene (Bautista *et al.*, 2011) was contemporary with this divergence



(Table 2) and with climatic cooling (Zachos *et al.*, 2001). This scenario agrees with the into-the-tropic hypothesis (Meseguer & Condamine, 2020).

Rate of *Cyprinodon* speciation increased upon separation from *Megupsilon* (node 11, Fig. 2-3). Several factors likely contributed to this trend. First, inland invasions into five Late Miocene rivers subdivided *Cyprinodon* into as many upland lineages, four of which dispersed across the desert region (Echelle *et al.*, 2005; Hoagstrom & Osborne, 2021). Once inland invasions were underway, drainage rearrangements, climate fluctuations, tectonism, and volcanism caused widespread allopatric diversification (Echelle, 2008; Knott *et al.*, 2008; Hoagstrom & Osborne, 2021). Meanwhile, a maritime lineage of *Cyprinodon* remained along the Gulf Coast (Echelle *et al.*, 2005, 2006), which is unclear in our ancestral-habitat reconstruction (Fig. 5) because the same widespread ancestor produced each upland invasion while remaining on the coast. During the Pleistocene, maritime *Cyprinodon* made new invasions into the desert region (Lozano-Vilano & Contreras-Balderas, 1999; Hoagstrom & Osborne, 2021) and immigrated to Caribbean islands and South America (Haney *et al.*, 2007, 2009). The Yucatán lineage produced a species flock (Strecker, 2006) (Fig. 3). Beyond this, our analysis may underestimate the *Cyprinodon* speciation rate because a species flock from San Salvador, Bahamas (Martin & Wainwright, 2013) and *C. variegatus hubbsi* (a potential distinct species, Jung *et al.*, 2019) are absent from our phylogeny, which also leaves out seven *Cyprinodon* species for which we had no genetic data. Finally, six of the recognized species included in the analysis are likely polyphyletic (Echelle & Echelle, 2020), but represented as one taxon here.

#### FUNDULIDAE

Early Eocene fundulids were theoretically living in the delta of the Houston-Brazos River. Divergence of *Leptolucania*, 54.2-33.6 Ma (Fig. 2, node 13), suggests immigration across the Suwannee Channel, to the Ocala High (Table 2), which developed peritidal landforms at this time (Avon Park and Ocala formations, Randazzo & Jones, 1997; Maliva *et al.*, 2011). Sea-level falls of 10-20 m at 43.6, 42.9, and 40.8 Ma (Miller *et al.*, 2020a) could have facilitated immigration. Subsequent sea-level rise (40 m, Middle Eocene Climatic Optimum, 40.1 Ma) could have isolated Ocala populations. Although *Leptolucania* is a freshwater genus, the ancestor likely had high salinity tolerance (Ghedotti & Davis, 2013).

Contrary to earlier reconstructions (Ghedotti & Davis, 2017), our phylogeny indicates *Lucania* is sister to *Fundulus*. As *Lucania interioris* is the earliest diverging lineage, we hypothesize *Lucania* originated in the northwestern Gulf of México. If high sea levels of the Middle Eocene allowed the MRCA of *Fundulus-Lucania* to expand southwest along the Gulf Coast, sea-level fall ~75 m (33.9-33.7 Ma, Miller *et al.*, 2020) could have isolated southwestern populations in the conjoined Río Grande-Río San Fernando delta (Snedden & Galloway, 2019), in agreement with divergence of *Lucania*, 42.8-27.4 Ma (Fig. 2, node 14, Table 2).

Divergence of *Fundulus* subgenus *Wileyichthys* 38.9-25.2 Ma (Fig. 2, node 15, Table 2), the MRCA invaded the ancestral Río Grande, which extended northwest to the Continental Divide, proximate to the Pacific Coast (Blakey & Ranney, 2018; Snedden & Galloway, 2019). Fossil *Fundulus* in the Great Basin (Smith *et al.*, 2002) are consistent with this hypothesis. A pulse of intense volcanism in the northern Sierra Madre Occidental 34-28 Ma (Ferrari *et al.*, 2018) presumably isolated *Wileyichthys* from relatives in the Gulf of México watershed.

The major split within *Fundulus*, 32.1-21.6 Ma (Fig. 2, node 16) corresponds to sea-level oscillations every 1.2 Ma (O<sub>2</sub>-Mi<sub>1</sub> low stands, 32.1-17.6 Ma, Boulila *et al.*, 2011), which reached 30-40 m below modern sea level (Miller *et al.*, 2020b), potentially separating the Mississippi and Houston-Brazos deltas (Table 2). Also, ~26 Ma, a slope failure west of the Mississippi Delta created the Hackberry Embayment (Snedden & Galloway, 2019), which might have been a deepwater barrier between deltas. We hypothesize *Zygonectes-F. sciadicus-Plancterus* originated in the Mississippi River delta because *Plancterus* (node 18) is Mississippian and is the westernmost lineage on this branch. By default, subgenus *Fundulus* presumably originated in Houston-Brazos River delta. Later abandonment of the Houston-Brazos Delta (Oligo-Miocene transition, 23 Ma, Snedden & Galloway, 2019) could have had transferred subgenus *Fundulus* into the new Red River delta, which later merged with the Mississippi (15 Ma, Snedden & Galloway, 2019), potentially bringing subgenus *Fundulus* along.

#### SUBGENUS *FUNDULUS*

Earliest branching within subgenus *Fundulus* reflects ecological speciation. *Fundulus majalis-F. persimilis-F. similis* inhabit unvegetated coastal habitats where they dive into soft sediments for cover rather than retreating to vegetation like typical *Fundulus* (Martin & Finucane, 1968; Harvey, 1998). They are adapted for continuous

swimming in the surf zone (Yetsko & Sancho, 2015) and spawn in unvegetated habitats (Greeley *et al.*, 1986). *Fundulus majalis* segregates from congeners in unvegetated, high salinity waters (Weisberg, 1986; Wagner & Austin, 1999). We propose this lineage represents an ancestor adapted for open coasts. Divergence 23.8-18.2 Ma (Fig. 2, node 17) was concurrent with abandonment of the Houston-Brazos delta, suggesting this lineage might represent populations left behind and adapted to surf-zone habitats that developed once the Houston-Brazos delta was abandoned.

#### SUBGENUS *ZYGONECTES-F. SCIADICUS-PLANCTERUS*

Our Funduloidea tree uniquely groups *F. sciadicus* as sister to *Plancterus* (*F. kansae-F. zebrinus*). Divergence from *Zygonectes*, 27.1-17.4 Ma (Fig. 2, node 18, Table 2), suggests the MRCA of *F. sciadicus-Plancterus* immigrated up the Mississippi River (Fig. 5), which extended to the Rocky Mountains (Snedden & Galloway, 2019). *Fundulus sciadicus* and *Plancterus* are grassland associates (Fausch & Bestgen, 1997), suggesting their MRCA adapted to grassland habitats, which developed across interior North America at this time (Andermann *et al.*, 2022). The fossil †*F. detillae* (5.0-2.6 Ma, Ghedotti & Davis, 2017), confirms the lineage occupied the plains.

#### DISCUSSION

We used evidence from our analyses with literature review to develop a biogeographical scenario of early diversification within Funduloidea. We applied the expectation of divergence through allopatric reproductive isolation, which is predominant for freshwater fishes (Seehausen & Wagner, 2014). We inferred cases of ecological reproductive isolation only when there was no straightforward evidence for allopatry and, at the same time, there was evidence for ecological differentiation. For coastal ancestors, we expected sea-level rise to facilitate range expansion along coastlines, with sea-level falls causing population fragmentation (Dolby *et al.*, 2018, 2020). For ocean gaps, we expected the reverse, lowered sea levels should facilitate cross-gap dispersal. We expected periods of climatic cooling to facilitate temperate species invading tropical habitats (into-the-tropics hypothesis, Meseguer & Condamine, 2020). Finally, our scenario maintained geographical consistency and compatibility across the phylogeny (Hoagstrom & Echelle, 2022).

Adaptive radiation (Martin & Wainwright, 2011), viviparity (Helmstetter *et al.*, 2016), and transition to freshwater (Bloom *et al.*, 2013) may increase speciation rate. Adaptive radiation is observed in *Cyprinodon* (Martin & Wainwright, 2011; Hernandez *et al.*, 2018), helping explain accelerated speciation. *Cyprinodon* radiations appear to be associated with interbreeding among lineages establishing secondary contact (Richards *et al.*, 2021), suggesting other families lacked genetic potential.

Viviparity is absent in Cubanichthyidae, Cyprinodontidae, Fundulidae, and Profundulidae and we did not detect an increase in speciation rate with viviparity in Goodeidae, in contrast to Helmstetter *et al.* (2016), who placed the origin of Goodeinae at ~8.9 Ma (vs. ~21.2 Ma here). Differences in our methods were (1) we evaluated a species-level phylogeny (rather than genus-level), (2) we partitioned data by gene instead of codon position, (3) we used combined tip- and node-based fossil calibration, and (4) we did not use “†*Cyprinodon breviradius*” for calibration. Other studies (Webb *et al.*, 2004; Pérez-Rodríguez *et al.*, 2015; Rabosky *et al.*, 2018) recovered divergence estimates for Goodeinae relatively similar to ours. Further, the biogeography of Goodeinae is attributable to range expansion and fragmentation during development of the TMVB (Webb *et al.*, 2004; Domínguez-Domínguez *et al.*, 2010; Pérez-Rodríguez *et al.*, 2015), which initiated ~20 Ma (Ferrari *et al.*, 2012). A goodein lineage originating only 8.9 Ma (as in Helmstetter *et al.*, 2016) would have missed this history and lacked dispersal routes to facilitate its present range.

Transition to freshwater occurs in all major funduloid families but only relates to an increased rate of speciation in Cyprinodontidae. This is interesting for Goodeidae, which also developed viviparity (discussed above), but did not achieve accelerated speciation. Using LTT plots, Pérez-Rodríguez *et al.* (2015) found an early acceleration in speciation, whereas we did not and the slope of our LTT plot resembles a horizontal line ( $\lambda = 0.15$  mean). In contrast, transition to freshwater is associated with accelerated speciation in *Cyprinodon* (described above). Poeciliid fishes also exhibit increased diversification within the North American desert (García-Andrade *et al.*, 2021) where they cooccur with *Cyprinodon* (Minckley *et al.*, 1991), suggesting their shared histories are responsible for their accelerated rates of speciation.

Barrier displacement refers to processes like mountain uplift and river capture, which separate and merge faunas (Albert *et al.*, 2017). This process leaves a phylogenetic signal, present in Funduloidea, in which early-branching lineages are geographically peripheral, with limited diversification (Table 3). Most striking within Funduloidea are four sequential instances in Cyprinodontidae, with early-branching lineages isolated south or east of the main distribution of the family. Detailed examples illustrate barrier displacement within Funduloidea (Echelle, 2008; Domínguez-Domínguez *et al.*, 2010; Hoagstrom & Osborne, 2021). As a subtle form of barrier displacement, evidence implies there were periodic coastal immigrations by Fundulidae and Cyprinodontidae from the northern Gulf Coast to Yucatán, suggesting populations took advantage of climatic cooling. Relyea, (1983) inferred that the northern limit of mangroves was an ecological boundary for Nearctic funduloids. If so, periods of cooling may have diminished ecological resistance, giving Nearctic lineages opportunities to invade southward (into-the-tropics hypothesis, Meseguer & Condamine, 2020).

Fundulidae is the only funduloid family that diversified mostly within a tectonically stable regional, where rivers generate species diversity through high rates of river captures and low rates of extinction (Albert *et al.*, 2018). Drainage rearrangements on the Gulf Coastal Plain likely facilitated diversification within *Fundulus*. In addition, north-south tributaries to the Gulf of México provided glacial refugia (Whitehead, 2010).

**Table 3.** Phylogenetic evidence for diversification by barrier displacement, early diverging lineages with peripheral geography and relatively limited diversification. Sister clades are provided for comparison. The chronogram node (Fig. 2) is given for each sister relation. <sup>1</sup>count includes described species missing from our phylogeny (Fig. 2). <sup>2</sup>Count includes species flock in Chichancanab.

| No | Geographically peripheral, early diverging lineage | Species <sub>1</sub> | Geography                      | Sister lineage                        | Species <sub>s1</sub> | Geography                                |
|----|----------------------------------------------------|----------------------|--------------------------------|---------------------------------------|-----------------------|------------------------------------------|
| 6  | Empetrichthyinae                                   | 4                    | Mojave Desert                  | Goodeinae                             | 46                    | Trans-Mexican Volcanic Belt              |
| 7  | Characodontini-Ilyodontini                         | 12                   | Sierra Madre Occidental        | Goodeinae (remainder)                 | 34                    | Trans-Mexican Volcanic Belt              |
| 8  | <i>Jordanella pulchra</i> - <i>Floridichthys</i>   | 3                    | Yucatán Peninsula              | Cyprinodontidae (remainder)           | 42                    | Northwestern Gulf of México              |
| 9  | <i>Cualac</i>                                      | 1                    | Río Pánuco                     | Cyprinodontidae (remainder)           | 41                    | Northwestern Gulf of México              |
| 10 | <i>Jordanella floridae</i>                         | 1                    | Florida Peninsula              | Cyprinodontidae (remainder)           | 40                    | Northwestern Gulf of México              |
| 11 | <i>Megupsilon</i>                                  | 1                    | Río San Fernando               | <i>Cyprinodon</i>                     | 39                    | Northwestern Gulf of México              |
| 12 | Yucatán <i>Cyprinodon</i> <sup>2</sup>             | 8                    | Yucatán Peninsula              | <i>Cyprinodon</i> (remainder)         | 31                    | Northwestern Gulf of México              |
| 13 | <i>Leptolucania</i>                                | 1                    | Florida Peninsula              | <i>Lucania-Fundulus</i>               | 40                    | North-central Gulf of México             |
| 15 | <i>Wileyichthys</i>                                | 2                    | Pacific Coast                  | <i>Fundulus-Plancterus-Zygonectes</i> | 35                    | North-central Gulf of México             |
| 18 | <i>Fundulus sciadicus-Plancterus</i>               | 3                    | Northwestern plains & prairies | <i>Zygonectes</i>                     | 13                    | Southeastern woodlands, prairies, swamps |

## CONCLUSIONS

Although scenarios inferred here deserve further study, the phylogeny of Funduloidea supports environmental evidence, providing reciprocal illumination. For example, sea-level falls coincide in time with likely immigrations to the Florida Platform and with periods of lineage isolation along coastlines. Ancient river courses potentially link inland lineages that are now disjunct. Niche shifts coincide with availability of novel ecosystems (open coasts, grasslands). Evidence from Funduloidea is compatible the Gulf Drawdown hypothesis, which remains under investigation (Cossey *et al.*, 2021).

All things considered, Funduloidea diversification can be credited to prolonged persistence in a dynamic region with sufficient time to diversify, ability to diversify along coastlines via climatic and sea-level fluctuations, and ability to invade inland and become broadly dispersed and diversified via barrier displacement. An overall signal of diversification via time-for-speciation agrees with recent studies (Rabosky, 2020; Miller, 2021). We do not detect a freshwater-fish paradox. Diversification occurred at similar rates between coastal and freshwater lineages and accelerated speciation in Cyprinodontidae included freshwater and marine lineages. Funduloidea displays exceptional ability to transition from coastal to inland habitats and appears to illustrate that a tolerant, explorative lineage, surviving over more than sixty-million years, can exploit rare opportunities for range expansions and niche shifts, leading to lineage branching and sustained or even accelerated diversification. Because the Gulf of México has offered many such opportunities throughout history, funduloid killifishes have dramatically diversified, writing their own version of the Gulf's history in their phylogeny.

## REFERENCES

- Abdullin F, Solé J, Meneses-Rocha J de J, Solari L, Shchepetilnikova V, Ortega-Obregón C. 2016.** LA-ICP-MS-based apatite fission track dating of the Todos Santos Formation sandstones from the Sierra de Chiapas (SE Mexico) and its tectonic significance. *International Geology Review* **58**: 32–48.
- Albert JS, Craig JM, Tagliacollo VA, Petry P. 2018.** Upland and lowland fishes: A Test of the River Capture Hypothesis. In: Hoorn C, Perrigo A, Antonelli A, eds. *Mountains, Climate, Biodiversity*. Hoboken, NJ.: John Wiley & Sons, 273–294.
- Albert JS, Schoolmaster DR, Tagliacollo V, Duke-Sylvester SM. 2017.** Barrier displacement on a neutral landscape: Toward a theory of continental biogeography. *Systematic Biology* **66**: 167–182.
- Andermann T, Strömberg CAE, Antonelli A, Silvestro D. 2022.** The origin and evolution of open habitats in North America inferred by Bayesian deep learning models. *Nature Communications* **13**: 1–13.
- April J, Hanner RH, Dion-Côté AM, Bernatchez L. 2013.** Glacial cycles as an allopatric speciation pump in north-eastern American freshwater fishes. *Molecular Ecology* **22**: 409–422.
- Aranda-Gómez JJ, Housh TB, Luhr JF, Henry CD, Becker T, Chávez-Cabello G. 2005.** Reactivation of the San Marcos fault during mid-to-late Tertiary extension, Chihuahua, Mexico. *Special Paper of the Geological Society of America* **393**: 509–521.
- Aranda-Gómez JJ, Luhr JF, Housh TB, Valdez-Moreno G, Chávez-Cabello G. 2007.** Late Cenozoic intraplate-type volcanism in central and northern México: A review. *Special Paper of the Geological Society of America* **422**: 93–128.
- Barbour CD. 1973.** A Biogeographical history of *Chirostoma* (Pisces: Atherinidae): A Species Flock from the Mexican Plateau. *Copeia* **1973**: 533.
- Bautista F, Palacio-Aponte G, Quintana P, Zinck JA. 2011.** Spatial distribution and development of soils in tropical karst areas from the Peninsula of Yucatan, Mexico. *Geomorphology* **135**: 308–321.
- Beaulieu JM, Tank DC, Donoghue MJ. 2013.** A Southern Hemisphere origin for campanulid angiosperms, with traces of the break-up of Gondwana. *BMC Evolutionary Biology* **13**: 1–17.
- Beltrán-López RG, Pérez-Rodríguez R, Montañez-García OC, Artigas-Azas JM, Köck M, Mar-Silva AF, Domínguez-Domínguez O. 2021.** Genetic differentiation in the genus *Characodon*: implications for conservation and taxonomy. *PeerJ* **9**: 9:e11492.
- Beltrán-Triviño A, Martens UC, von Quadt A. 2021.** Siliciclastic provenance of the Cenozoic stratigraphic succession in the southern Gulf of Mexico: Insights from U-Pb detrital zircon geochronology and heavy minerals analysis. In: Martens UC, Molina Garza RS, eds. *Southern and Central Mexico: Basement Framework, Tectonic Evolution, and Provenance of Mesozoic–Cenozoic Basins*. Boulder: The Geological Society of America Special

Paper 546, 1–34.

**Blakey RC, Ranney WD. 2018.** *Ancient landscapes of western North America: A geologic history with paleogeographic maps*. Cham: Springer.

**Bloom DD, Weir JT, Piller KR, Lovejoy NR. 2013.** Do freshwater fishes diversify faster than marine fishes? a test using state-dependent diversification analyses and molecular phylogenetics of New World Silversides (Atherinopsidae). *Evolution* **67**: 2040–2057.

**Bouckaert R, Vaughan TG, Barido-Sottani J, Duchêne S, Fourment M, Gavryushkina A, Heled J, Jones G, Kühnert D, De Maio N, Matschiner M, Mendes FK, Müller NF, Ogilvie HA, Du Plessis L, Poppinga A, Rambaut A, Rasmussen D, Siveroni I, Suchard MA, Wu CH, Xie D, Zhang C, Stadler T, Drummond AJ. 2019.** BEAST 2.5: An advanced software platform for Bayesian evolutionary analysis. *PLoS Computational Biology* **15**: 1–28.

**Boulila S, Galbrun B, Miller KG, Pekar SF, Browning J V., Laskar J, Wright JD. 2011.** On the origin of Cenozoic and Mesozoic ‘third-order’ eustatic sequences. *Earth-Science Reviews* **109**: 94–112.

**Brix K V., Grosell M. 2013.** Evaluation of pre- and post-zygotic mating barriers, hybrid fitness and phylogenetic relationship between *Cyprinodon variegatus variegatus* and *Cyprinodon variegatus hubbsi* (Cyprinodontiformes, Teleostei). *Journal of Evolutionary Biology* **26**: 854–866.

**Cashner MF, Echelle AA. 2020.** Profundulidae: Middle American killifishes. *North America volume 2, Characidae to Poeciliidae*. In: Warren Jr. M, Burr B, eds. Baltimore: Johns Hopkins University Press, 493–502.

**Casemiro FAS, Albert JS, Antonelli A, Menegotto A, Wüest RO, Cerezer F, Coelho MTP, Reis RE, Tan M, Tagliacollo VA, Bailly D, da Silva VFB, Frota A, da Graça WJ, Re R, Ramos T, Oliveira AG, Dias MS, Colwell RK, Rangel TF, Graham CH. 2023.** Landscape dynamics and diversification of the megadiverse South American freshwater fish fauna. *Proceedings of the National Academy of Sciences* **120**: e2211974120.

**Chávez-Cabello G, Aranda-Gómez JJ, Molina-Garza RS, Cossío-Torres T, Arvizu-Gutiérrez IR, González-Naranjo GA. 2007.** The San Marcos fault: A Jurassic multireactivated basement structure in northeastern México. In: Alaniz-Álvarez SA, Nieto-Samaniego ÁF, eds. *Geology of México: Celebrating the Centenary of the Geological Society of México*. Boulder: Geological Society of America special paper 422, 261–286.

**Cossey SPJ, Van Nieuwenhuise D, Davis J, Rosenfeld JH, Pindell J. 2016.** Compelling evidence from eastern Mexico for a Late Paleocene/Early Eocene isolation, drawdown, and refill of the Gulf of Mexico. *Interpretation* **4**: SC63–SC80.

**Cossey SPJ, Rosenfeld J, Bitter M, Pindell J. 2021.** Update on the Paleogene water-level drawdown hypothesis, Gulf of Mexico. *GCAGS Journal* **10**: 123–141.

**Costa WJEM. 1998.** Phylogeny and Classification of the Cyprinodontiformes (Euteleostei : Atherinomorpha ): A Reappraisal. In: Malabarba LR, Reis RE, Vari RP, Lucena Z. M, Lucena CAS, eds. *Phylogeny and Classification of Neotropical Fishes*. Porto Alegre: EDIPUCRS, 537–560.

**Cross FB, Moss RE.** Historic changes in fish communities and aquatic habitats in plains streams of Kansas. In Matthes WJ, Heins DC, eds. *Community and evolutionary ecology of North American stream fishes*. Norman: University of Oklahoma Press, 155–165.

**Crowell JC. 2003.** Introduction to geology of Ridge Basin, southern California. In: Crowell JC, ed. *Evolution of Ridge Basin, Southern California: an interplay of sedimentation and tectonics*. Boulder: Geological Society of America Special Paper 367: 1–15.

**Darriba D, Taboada GL, Doallo R, Posada D. 2012.** JModelTest 2: More models, new heuristics and parallel computing. *Nature Methods* **9**: 772.

**Dolby GA, Bedolla AM, Bennett SEK, Jacobs DK. 2020.** Global physical controls on estuarine habitat distribution during sea level change: Consequences for genetic diversification through time. *Global and Planetary Change* **187**: 103128.

**Dolby GA, Ellingson RA, Findley LT, Jacobs DK. 2018.** How sea level change mediates genetic divergence in coastal species across regions with varying tectonic and sediment processes. *Molecular Ecology* **27**: 994–1011.

**Dolby GA, Hechinger R, Ellingson RA, Findley LT, Lorda J, Jacobs DK. 2016.** Sea-level driven glacial-age refugia and post-glacial mixing on subtropical coasts, a palaeohabitat and genetic study. *Proceedings of the Royal Society B: Biological Sciences* **283**: 20161571.

**Domínguez-Domínguez O, Pedraza-Lara C, Gurrola-Sánchez N, Perea S, Pérez-Rodríguez R, Israde-Alcántara I, Garduño-Monroy VH, Doadrio I, Pérez-Ponce de León G, Brooks DR. 2010.** Historical Biogeography of the Goodeinae (Cyprinodontiforms). In: Uribe MC, Grier HJ, eds. *Viviparous fishes II*. Homestead, FL.: New Life Publications, 13–30.

**Drummond AJ, Ho SYW, Phillips MJ, Rambaut A. 2006.** Relaxed phylogenetics and dating with confidence. *PLoS Biology* **4**: 699–710.

- Echelle AA. 2008.** The western North American pupfish clade (Cyprinodontidae: Cyprinodon): Mitochondrial DNA divergence and drainage history. *Special Paper of the Geological Society of America* **439**: 27–38.
- Echelle AA, Carson EW, Echelle AF, Van Den Bussche RA, Dowling TE, Meyer A. 2005.** Historical biogeography of the New-World pupfish genus *Cyprinodon* (Teleostei: Cyprinodontidae). *Copeia* **2005**: 320–339.
- Echelle AA, Echelle AF. 2020.** Cyprinodontidae: Pupfishes. In: Warren jr. ML, Burr BM, eds. *Freshwater fishes of North America volume 2, Characidae to Poeciliidae*. Baltimore: Johns Hopkins University Press, 609–673.
- Echelle AA, Fuselier L, Van Den Bussche RA, Rodriguez CML, Smith ML. 2006.** Molecular systematics of Hispaniolan pupfishes (Cyprinodontidae: *Cyprinodon*): Implications for the biogeography of insular Caribbean fishes. *Molecular Phylogenetics and Evolution* **39**: 855–864.
- Edgar RC. 2004.** MUSCLE: Multiple sequence alignment with high accuracy and high throughput. *Nucleic Acids Research* **32**: 1792–1797.
- Edwards EJ, Osborne CP, Strömberg CAE, Smith SA, Bond WJ, Christin PA, Cousins AB, Duvall MR, Fox DL, Freckleton RP, Ghannoum O, Hartwell J, Huang Y, Janis CM, Keeley JE, Kellogg EA, Knapp AK, Leakey ADB, Nelson DM, Saarela JM, Sage RF, Sala OE, Salamin N, Still CJ, Tiplle B. 2010.** The origins of C4 Grasslands: Integrating evolutionary and ecosystem science. *Science* **328**: 587–591.
- Elías DJ, McMahan CD, Matamoros WA, Gómez-González AE, Piller KR, Chakrabarty P. 2020.** Scale(s) matter: Deconstructing an area of endemism for Middle American freshwater fishes. *Journal of Biogeography* **47**: 2483–2501.
- Eronen JT, Fortelius M, Micheels A, Portmann FT, Puolamäki K, Janis CM. 2012.** Neogene aridification of the northern hemisphere. *Geology* **40**: 823–826.
- Fagan WF, Unmack PJ, Burgess C, Minckley WL. 2002.** Rarity, fragmentation, and extinction risk in desert fishes. *Ecology* **83**: 3250–3256.
- Fausch KD, Bestgen KR. 1997.** Ecology of Fishes Indigenous to the Central and Southwestern Great Plains. In: Knopf FL, Samson FB, eds. *Ecology and Conservation of Great Plains Vertebrates*. New York: Springer New York, 131–166.
- Ferrari L, Orozco-Esquivel T, Bryant SE, López-Martínez M, Silva-Fragoso A. 2018.** Cenozoic magmatism and extension in western Mexico : linking the Sierra Madre Occidental Silicic Large Igneous Province and the Comondú Group with the Gulf of California rift. *Earth-Science Reviews* **183**: 115–152.
- Ferrari L, Orozco-Esquivel T, Manea V, Manea M. 2012.** The dynamic history of the Trans-Mexican Volcanic Belt and the Mexico subduction zone. *Tectonophysics* **522–523**: 122–149.
- Foster KL, Piller KR. 2018.** Disentangling the drivers of diversification in an imperiled group of freshwater fishes (Cyprinodontiformes: Goodeidae). *BMC Evolutionary Biology* **18**: 1–12.
- Galloway WE, Whiteaker TL, Ganey-Curry P. 2011.** History of Cenozoic North American drainage basin evolution, sediment yield, and accumulation in the Gulf of Mexico basin. *Geosphere* **7**: 938–973.
- García-Andrade AB, Carvajal- AJD, Tedesco PA, Villalobos F. 2021.** Evolutionary and environmental drivers of species richness in poeciliid fishes across the Americas. *Global Ecology and Biogeography* **30**: 1245–1257.
- Ghedotti MJ, Davis MP. 2017.** The taxonomic placement of three fossil *Fundulus* species and the timing of divergence within the North American topminnows (Teleostei: Fundulidae). *Zootaxa* **4250**: 577–586.
- Ghezelayagh A, Harrington RC, Burress ED, Campbell MA, Buckner JC, Chakrabarty P, Glass JR, McCraney WT, Unmack PJ, Thacker CE, Alfaro ME, Friedman ST, Ludt WB, Cowman PF, Friedman M, Price SA, Dornburg A, Faircloth BC, Wainwright PC, Near TJ. 2022.** Prolonged morphological expansion of spiny-rayed fishes following the end-Cretaceous. *Nature Ecology and Evolution* **6**: 1211–1220.
- Grant EC, Riddle BR. 1995.** Are the endangered Springfish (*Crenichthys* Hubbs) and Poolfish (*Empetrichthys* Gilbert) fundulines or goodeids?: A mitochondrial DNA assessment. *Copeia* **1995**: 209–212.
- Greeley MS, Marion KR, MacGregor R. 1986.** Semilunar spawning cycles of *Fundulus similis* (Cyprinodontidae). *Environmental Biology of Fishes* **17**: 125–131.
- Gutiérrez-García TA, Vázquez-Domínguez E. 2013.** Consensus between genes and stones in the biogeographic and evolutionary history of Central America. *Quaternary Research* **79**: 311–324.
- Guzmán AF. 2010.** Microscopical analysis of the fossil goodeid *Tapatia occidentalis*. In: Uribe M, Grier HJ, eds. *Viviparous fishes II*. Homestead, FL.: New Life Publications, 75–85.
- Haney RA, Silliman BR, Fry AJ, Layman CA, Rand DM. 2007.** The Pleistocene history of the sheepshead minnow (*Cyprinodon variegatus*): Non-equilibrium evolutionary dynamics within a diversifying species complex. *Molecular Phylogenetics and Evolution* **43**: 743–754.
- Haney RA, Turner BJ, Rand DM. 2009.** A cryptic lineage within the pupfish *Cyprinodon dearborni* suggests multiple colonizations of South America. *Journal of Fish Biology* **75**: 1108–1114.
- Harvey CJ. 1998.** Use of sandy beach habitat by *Fundulus majalis*, a surf-zone fish. *Marine Ecology Progress*

*Series* **164**: 307–310.

**Helmstetter AJ, Papadopulos AST, Igea J, Dooren TJM Van, Armand M, Savolainen V. 2016.** Viviparity stimulates diversification in an order of fish. *Nature Communications* **7**: 1–7.

**Hernandez LP, Adriaens D, Martin CH, Wainwright PC, Masschaele B, Dierick M. 2018.** Building trophic specializations that result in substantial niche partitioning within a young adaptive radiation. *Journal of Anatomy* **232**: 173–185.

**Hoagstrom CW, Echelle A. 2022.** Biogeography of the *Macrhybopsis aestivalis* complex (Teleostei: Cyprinidae): emphasis on speciation and ancient heterospecific mitochondrial transfer. *Environmental biology of fishes* **105**: 261–287.

**Hoagstrom CW, Osborne MJ. 2021.** Biogeography of *Cyprinodon* across the Great Plains-Chihuahuan Desert region and adjacent areas. *Proceedings of the Desert Fishes Council Special Publication* **2021**: 20–76.

**Joy JB, Liang RH, McCloskey RM, Nguyen T, Poon AFY. 2016.** Ancestral reconstruction. *PLoS Computational Biology* **12**: e1004763.

**Jung EH, Brix K V., Brauner CJ. 2019.** The effect of temperature acclimation on thermal tolerance, hypoxia tolerance and aerobic scope in two subspecies of sheepshead minnow; *Cyprinodon variegatus variegatus* and *Cyprinodon variegatus hubbsi*. *Comparative Biochemistry and Physiology -Part A : Molecular and Integrative Physiology* **232**: 28–33.

**Karlstrom KE, Jacobson CE, Sundell KE, Eyster A, Blakey R, Ingersoll R V., Mulder JA, Young RA, Beard LS, Holland ME, Shuster DL, Winn C, Crossey L. 2020.** Evaluating the Shinumo-Sespe drainage connection: Arguments against the “old” (70-17 Ma) Grand Canyon models for Colorado Plateau drainage evolution. *Geosphere* **16**: 1425–1456.

**Knott JR, Machette MN, Klinger RE, Sarna-Wojcicki AM, Liddicoat JC, Tinsley JC, David BT, Ebbs VM. 2008.** Reconstructing late Pliocene to middle Pleistocene Death Valley lakes and river systems as a test of pupfish (Cyprinodontidae) dispersal hypotheses. *Special Paper of the Geological Society of America* **439**: 1–26.

**Kumar S, Stecher G, Li M, Knyaz C, Tamura K. 2018.** MEGA X: Molecular evolutionary genetics analysis across computing platforms. *Molecular Biology and Evolution* **35**: 1547–1549.

**Link MH. 2003.** Depositional systems and sedimentary facies of the Miocene-Pliocene Ridge Basin Group, Ridge Basin, southern California. In: Crowell JC, ed. *Geological Society of America Special Paper 367*. Boulder: Geological Society of America, 17–87.

**Lozano-Vilano M de L, Contreras-Balderas S. 1999.** *Cyprinodon bobmilleri*: New Species of Pupfish from Nuevo León, México (Pisces: Cyprinodontidae). *Copeia* **1999**: 382–387.

**Maddison WP, Maddison DR. 2016.** Mesquite: a modular system for evolutionary analysis: 3.11.

**Maliva RG, Budd DA, Clayton EA, Missimer TM, Dickson JAD. 2011.** Insights into the dolomitization process and porosity modification in sucrosic dolostones, Avon Park Formation (Middle Eocene), East-Central Florida, U.S.A. *Journal of Sedimentary Research* **81**: 218–232.

**Martens UC, Sierra-Rojas MI. 2021.** Late Cretaceous–Paleocene transition from calcareous platform to basinal deposition in western Chiapas, Mexico: Opening of the chiapanecan embayment. In: Martens UC, Garza RSM, eds. *Geological Society of America*. Boulder: Geological Society of America, [https://doi.org/10.1130/2021.2546\(07\)](https://doi.org/10.1130/2021.2546(07)).

**Martin DF. 1968.** Intraspecific Variation in Osmotic Abilities of *Cyprinodon Variegatus* Lacepede from the Texas Coast. *Ecology* **49**: 1186–1188.

**Martin RA, Finucane JH. 1968.** Reproduction and ecology of the longnose killifish. *Quarterly journal of the Florida Academy of Sciences* **31**: 101–111.

**Martin CH, Wainwright PC. 2011.** Trophic novelty is linked to exceptional rates of morphological diversification in two adaptive radiations of cyprinodon pupfish. *Evolution* **65**: 2197–2212.

**Martin CH, Wainwright PC. 2013.** Multiple fitness peaks on the adaptive landscape drive adaptive radiation in the wild. *Science* **339**: 208–211.

**Mastretta-Yanes A, Moreno-Letelier A, Piñero D, Jorgensen TH, Emerson BC. 2015.** Biodiversity in the Mexican highlands and the interaction of geology, geography and climate within the Trans-Mexican Volcanic Belt. *Journal of Biogeography* **42**: 1586–1600.

**McDermott A. 2021.** Reeling in answers to the ‘freshwater fish paradox’. *Proceedings of the National Academy of Sciences* **118**: e2113780118.

**Meseguer AS, Condamine FL. 2020.** Ancient tropical extinctions at high latitudes contributed to the latitudinal diversity gradient\*. *Evolution* **74**: 1966–1987.

**Miller RR. 1955.** A Systematic Review of the Middle American Fishes of the Genus *Profundulus*. *Miscellaneous Publications of the Museum of Zoology, University of Michigan* **92**: 1–64.

**Miller EC. 2021.** Comparing diversification rates in lakes, rivers, and the sea. *Evolution* **75**: 2055–2073.

- Miller KG, Browning J V., John Schmelz W, Kopp RE, Mountain GS, Wright JD. 2020a.** Cenozoic sea-level and cryospheric evolution from deep-sea geochemical and continental margin records. *Science Advances* **6**: eaaz1346.
- Miller RR, Minckley WL, Norris SM. 2005.** *Freshwater fishes of Mexico*. Chicago, IL: The University of Chicago Press.
- Miller MA, Pfeiffer W, Schwartz T. 2010.** Creating the CIPRES Science Gateway for inference of large phylogenetic trees. *Gateway computing environments workshop (GCE) 2010*: 1–8.
- Miller KG, Schmelz WJ, Browning J V., Kopp RE, Mountain GS, Wright JD. 2020b.** Ancient sea level as key to the future. *Oceanography* **33**: 33–41.
- Miller RR, Smith ML. 1986.** Origin and geography of the fishes of central Mexico. In: Hocutt CH, Wiley EO, eds. *The zoogeography of North American freshwater fishes*. New York: John Wiley & Sons, 487–517.
- Minckley WL, Hendrickson DA, Bond CE. 1986.** Geography of western North American freshwater fishes: description and relations to intracontinental tectonism. In: Hocutt CH, Wiley EO, eds. *Zoogeography of Western North American Freshwater Fishes*. New York: John Wiley and Sons, 519–613.
- Minckley WL, Meffe GK, Soltz DL. 1991.** Conservation and management of short-lived fishes: the cyprinodontoids. In: Minckley WL, Deacon JE, eds. *Battle against extinction: native fish management in the American West*. Tucson: University Arizona Press, 247–282.
- Nieto-Samaniego ÁF, Alaniz-Álvarez SA, Camprubí A. 2007.** Mesa Central of México: Stratigraphy, structure, and Cenozoic tectonic evolution. *Special Paper of the Geological Society of America* **422**: 41–70.
- Nordlie FG. 2006.** Physicochemical environments and tolerances of cyprinodontoid fishes found in estuaries and salt marshes of eastern North America. *Reviews in Fish Biology and Fisheries* **16**: 51–106.
- Owens HL. 2015.** Evolution of codfishes (Teleostei: Gadinae) in geographical and ecological space: Evidence that physiological limits drove diversification of subarctic fishes. *Journal of Biogeography* **42**: 1091–1102.
- Padilla Y Sánchez RJ. 2007.** Evolución geológica del sureste mexicano, Golfo de México. *Boletín de la Sociedad Geológica Mexicana* **59**: 19–42.
- Palacios M, Arias-Rodríguez L, Plath M, Eifert C, Lerp H, Lamboj A, Voelker G, Tobler M. 2013.** The rediscovery of a long described species reveals additional complexity in speciation patterns of poeciliid fishes in sulfide springs. *PLoS ONE* **8**: e71069.
- Parenti LR. 1981.** A phylogenetic and biogeographic analysis of Cyprinodontiformes fishes (Teleostei, Atherinomorpha). *Bulletin of the American Museum of Natural History* **168**: 335–557.
- Passarotto A, Parejo D, Cruz-Miralles A, Avilés JM. 2018.** The evolution of iris colour in relation to nocturnality in owls. *Journal of Avian Biology* **49**: doi.org/10.1111/jav.01908.
- Pekar SF, Christie-Blick N, Kominz MA, Miller KG. 2002.** Calibration between eustatic estimates from backstripping and oxygen isotopic records for the Oligocene. *Geology* **30**: 903–906.
- Pérez-Miranda F, Mejía O, López B, Řičan O. 2020.** Molecular clocks, biogeography and species diversity in *Herichthys* with evaluation of the role of Punta del Morro as a vicariant brake along the Mexican Transition Zone in the context of local and global time frame of cichlid diversification. *PeerJ* **2020**: e8818.
- Pérez-Rodríguez R, Domínguez-Domínguez O, Doadrio I, Cuevas-García E, Pérez-Ponce de León G. 2015.** Comparative historical biogeography of three groups of Nearctic freshwater fishes across central Mexico. *Journal of Fish Biology* **86**: 993–1015.
- Piller KR, Parker E, Lemmon AR, Moriarty Lemmon E. 2022.** Investigating the utility of Anchored Hybrid Enrichment data to investigate the relationships among the Killifishes (Actinopterygii: Cyprinodontiformes), a globally distributed group of fishes. *Molecular Phylogenetics and Evolution* **173**: 107482.
- Plummer M, Best N, Cowles K, Vines K. 2006.** CODA: convergence diagnosis and output analysis for MCMC. *R news* **6**: 7–11.
- R Development Core Team. 2021.** *R: A Language and Environment for Statistical Computing*. Vienna: R Foundation for Statistical Computing.
- Rabosky DL. 2020.** Speciation rate and the diversity of fishes in freshwaters and the oceans. *Journal of Biogeography* **47**: 1207–1217.
- Rabosky DL, Chang J, Title PO, Cowman PF, Sallan L, Friedman M, Kaschner K, Garilao C, Near TJ, Coll M, Alfaro ME. 2018.** An inverse latitudinal gradient in speciation rate for marine fishes. *Nature* **559**: 392–395.
- Rabosky DL, Grundler M, Anderson C, Title P, Shi JJ, Brown JW, Huang H, Larson JG. 2014.** BAMMtools: An R package for the analysis of evolutionary dynamics on phylogenetic trees. *Methods in Ecology and Evolution* **5**: 701–707.
- Rambaut A. 2010.** *FigTree v1. 3.1*. Edinburgh: Institute of Evolutionary Biology, University of Edinburgh.
- Rambaut A, Drummond AJ, Xie D, Baele G, Suchard MA. 2018.** Posterior summarization in Bayesian



phylogenetics using Tracer 1.7. *Systematic Biology* **67**: 901–904.

**Randazzo AF, Jones DS. 1997.** The sedimentary platform of Florida: Mesozoic to Cenozoic. In: Randazzo AF, Jones DS, eds. *The Geology of Florida*. Gainesville: University Press of Florida, 39–56.

**Ree RH, Smith SA. 2008.** Maximum likelihood inference of geographic range evolution by dispersal, local extinction, and cladogenesis. *Systematic Biology* **57**: 4–14.

**Relyea K. 1983.** A systematic study of two species complexes of the genus *Fundulus* (Pisces: Cyprinodontidae). *Bulletin of the Florida State Museum of Biological Sciences* **29**: 1–64.

**Revell LJ. 2012.** phytools: An R package for phylogenetic comparative biology (and other things). *Methods in Ecology and Evolution* **3**: 217–223.

**Richards EJ, McGirr JA, Wang JR, St John ME, Poelstra JW, Solano MJ, O’Connell DC, Turner BJ, Martin CH. 2021.** A vertebrate adaptive radiation is assembled from an ancient and disjunct spatiotemporal landscape. *Proceedings of the National Academy of Sciences* **118**: e2011811118.

**Rico CN, Hoagstrom CW, Elías DJ, McMahan CD, Matamoros WA. 2022.** Biotic regionalization of freshwater fishes in Northern Middle America highlights high beta diversity created by prominent biogeographic barriers. *Frontiers of Biogeography* **14**: e58095.

**Ronquist F, Teslenko M, Van Der Mark P, Ayres DL, Darling A, Höhna S, Larget B, Liu L, Suchard MA, Huelsenbeck JP. 2012.** MrBayes 3.2: Efficient bayesian phylogenetic inference and model choice across a large model space. *Systematic Biology* **61**: 539–542.

**Roure F, Alzaga-Ruiz H, Callot JP, Ferket H, Granjeon D, Gonzalez-Mercado GE, Guilhaumou N, Lopez M, Mougín P, Ortuno-Arzate S, Séranne M. 2009.** Long lasting interactions between tectonic loading, unroofing, post-rift thermal subsidence and sedimentary transfers along the western margin of the Gulf of Mexico: Some insights from integrated quantitative studies. *Tectonophysics* **475**: 169–189.

**Rutschmann F. 2006.** Molecular dating of phylogenetic trees: A brief review of current methods that estimate divergence times. *Diversity and Distributions* **12**: 35–48.

**Santa Catharina A, Kneller BC, Marques JC, McArthur AD, Cevallos-Ferriz SRS, Theurer T, Kane IA, Muirhead D. 2022.** Timing and causes of forest fire at the K–Pg boundary. *Scientific Reports* **12**: 13006.

**Santos CMD, Capellari RS. 2009.** On reciprocal illumination and consilience in biogeography. *Evolutionary Biology* **36**: 407–415.

**Schulte P, Alegret L, Arenillas I, Arz JA, Barton PJ, Bown PR, Bralower TJ, Christeson GL, Claeys P, Cockell CS, Collins GS, Deutsch A, Goldin TJ, Goto K, Grajales-Nishimura JM, Grieve RAF, Gulick SPS, Johnson KR, Kiessling W, Koeberl C, Kring DA, MacLeod KG, Matsui T, Melosh J, Montanari A, Morgan J V., Neal CR, Nichols DJ, Norris RD, Pierazzo E, Ravizza G, Rebolledo-Vieyra M, Reimold WU, Robin E, Salge T, Speijer RP, Sweet AR, Urrutia-Fucugauchi J, Vajda V, Whalen MT, Willumsen PS. 2010.** The chixulub asteroid impact and mass extinction at the cretaceous-paleogene boundary. *Science* **327**: 1214–1218.

**Seehausen O, Wagner CE. 2014.** Speciation in freshwater fishes. *Annual Review of Ecology, Evolution, and Systematics* **45**: 621–651.

**Sidharthan A, Raghavan R, Anoop VK, Philip S, Dahanukar N. 2020.** Riddle on the riffle: Miocene diversification and biogeography of endemic mountain loaches in the Western Ghats Biodiversity Hotspot. *Journal of Biogeography* **47**: 2741–2754.

**Simpson DG, Gunter G. 1956.** Notes on habitats, systematic characters and life histories of Texas salt water cyprinodontes. *Tulane Studies in Zoology* **116**: 115–134.

**Smith GR. 1980.** *The evolutionary and ecological history of the fish fauna of the Rio Lerma basin, Mexico*. Unpublished Ph. D. thesis, University of Michigan.

**Smith GR, Miller RR. 1986.** The evolution of the Río Grande basin as inferred from its fish fauna. In: Hocutt CH, Wiley EO, eds. *The Zoogeography of North American Freshwater Fishes*. New York: Wiley, 457–485.

**Snedden JW, Galloway WE. 2019.** *The Gulf of Mexico Sedimentary Basin: Depositional Evolution and Petroleum Applications*. Cambridge: Cambridge University Press.

**Strecker U. 2006.** Genetic differentiation and reproductive isolation in a Cyprinodon fish species flock from Laguna Chichancanab, Mexico. *Molecular Phylogenetics and Evolution* **39**: 865–872.

**Tedesco PA, Paradis E, Lévêque C, Hugueny B. 2017.** Explaining global-scale diversification patterns in actinopterygian fishes. *Journal of Biogeography* **44**: 773–783.

**Uyeno T, Miller RR. 1962.** Relationships of *Empetrichthys erdisi*, a Pliocene Cyprinodontid Fish from California, with Remarks on the Fundulinae and Cyprinodontinae. *Copeia* **1962**: 520–532.

**Val P, Lyons NJ, Gasparini N, Willenbring JK, Albert JS, Unmack PJ. 2022.** Landscape Evolution as a Diversification Driver in Freshwater Fishes. *Frontiers in Ecology and Evolution* **9**: 1–17.

**Villagómez D, Steffensen C, Pindell J, Molina-Garza RS, Gray G, Graham R, O’Sullivan P, Stockli D,**

- Spikings R. 2022.** Tectono-sedimentary evolution of Southern Mexico. Implications for Cretaceous and younger source-to-sink systems in the Mexican foreland basins and the Gulf of Mexico. *Earth-Science Reviews* **231**: 104066.
- Vrba ES. 1995.** On the connections between paleoclimate and evolution. In: Vrba ES, Denton GH, Partridge TC, Burckle LH, eds. *Paleoclimate and evolution, with emphasis on human origins*. New Haven: Yale University Press, 24–45.
- Wagner CM, Austin HM. 1999.** Correspondence between environmental gradients and summer littoral fish assemblages in low salinity reaches of the Chesapeake Bay, USA. *Marine Ecology Progress Series* **177**: 197–212.
- Waters JM, Burrige CP, Craw D. 2019.** The lasting biological signature of Pliocene tectonics: Reviewing the re-routing of Australia’s largest river drainage system. *Journal of Biogeography* **46**: 1494–1503.
- Webb S. 2020.** Goodeids. In: Warren L, Burr B, eds. *Freshwater fishes of North America volume 2, Characidae to Poeciliidae*. Baltimore: Johns Hopkins University Press, 508–548.
- Webb S a, Graves J a, Macias-Garcia C, Magurran AE, Foighil DO, Ritchie MG. 2004.** Molecular phylogeny of the livebearing Goodeidae (Cyprinodontiformes). *Molecular phylogenetics and evolution* **30**: 527–44.
- Weisberg SB. 1986.** Competition and coexistence among four estuarine species of *Fundulus*. *American Zoologist* **26**: 249–257.
- Whitehead A. 2010.** The evolutionary radiation of diverse osmotolerant physiologies in killifish (*Fundulus* sp.). *Evolution; international journal of organic evolution* **64**: 2070–85.
- Witt C, Brichau S, Carter A. 2012.** New constraints on the origin of the Sierra Madre de Chiapas (south Mexico) from sediment provenance and apatite thermochronometry. *Tectonics* **31**: 1–15.
- Yetsko K, Sancho G. 2015.** The effects of salinity on swimming performance of two estuarine fishes, *Fundulus heteroclitus* and *Fundulus majalis*. *Journal of Fish Biology* **86**: 827–833.
- Yu Y, Blair C, He X. 2020.** RASP 4: Ancestral State Reconstruction Tool for Multiple Genes and Characters. *Molecular Biology and Evolution* **37**: 604–606.
- Yu Y, Harris AJ, He X. 2010.** S-DIVA (Statistical Dispersal-Vicariance Analysis): A tool for inferring biogeographic histories. *Molecular Phylogenetics and Evolution* **56**: 848–850.
- Zachos J, Pagani H, Sloan L, Thomas E, Billups K. 2001.** Trends, rhythms, and aberrations in global climate 65 Ma to present. *Science* **292**: 686–693.
- Zhang L, Hay WW, Wang C, Gu X. 2019.** The evolution of latitudinal temperature gradients from the latest Cretaceous through the Present. *Earth-Science Reviews* **189**: 147–158.

#### Figure legends

**FIGURE 1** Map depicting the distribution of Funduloidea between North and northern South America. The boundary between realms is the Trans-Mexican Volcanic Belt (TMVB; Rico et al., 2022). The red line depicts the boundary between the coastal plain physiographic province and continental uplands. Inset shows Funduloidea distribution within the Americas.

**FIGURE 2** Phylogenetic relationships and divergence times among taxa within Funduloidea. This topology was recovered by Bayesian inference with five concatenated loci (three mitochondrial, two nuclear) and 135 species. Red dots depict nodes with posterior probabilities <95%. Green arrows show fossil calibration points (Table 1). Numbered nodes are associated with environmental and geologic events in our biogeographical synthesis (Table 2).

**Figure 3** (a) BAMM phylorate plot showing speciation rates along each Funduloidea branch. Cool colors represent slow rates; warm colors represent fast rates. Speciation rates are shown for (b) Fundulidae, (c) Cyprinodontidae, (d) Profundulidae, (e) Goodeidae.  $\lambda$  = mean diversification rate.

**FIGURE 4** (a) distribution of Funduloidea species divided as Nearctic = A and Neotropical = B, (b) ancestral areas computed using the BAYAREALIKE+J model in BioGeoBEARS.

**FIGURE 5** Ancestral-habitat reconstruction. Pie graphs at each node represent the probability of each character state: Coast, Upland, Both.

Figure 1.

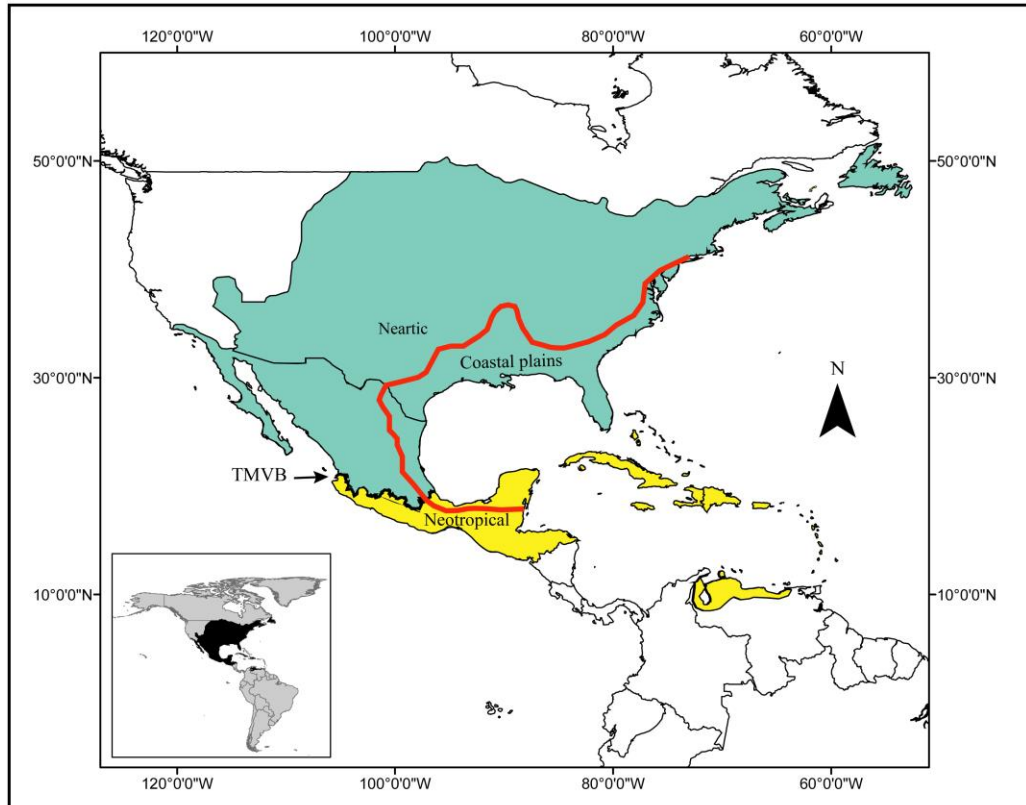



Figure 3.

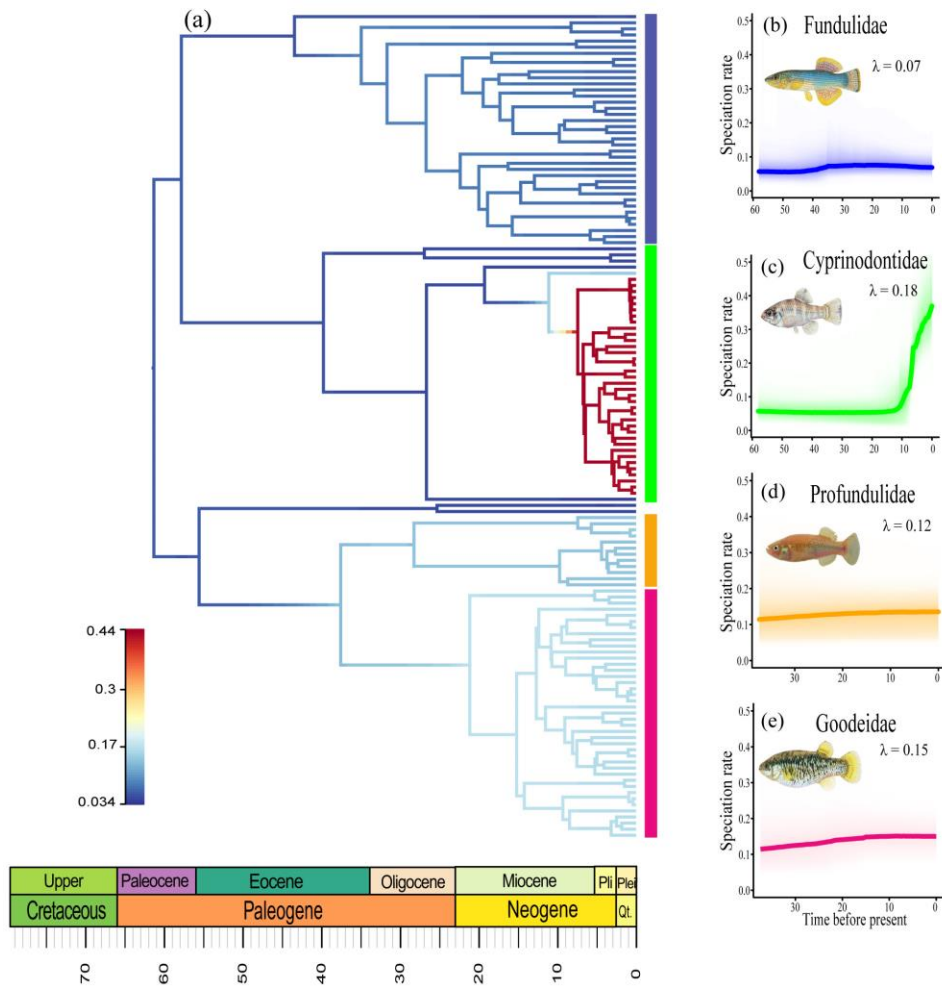

Figure 4.



Figure 5

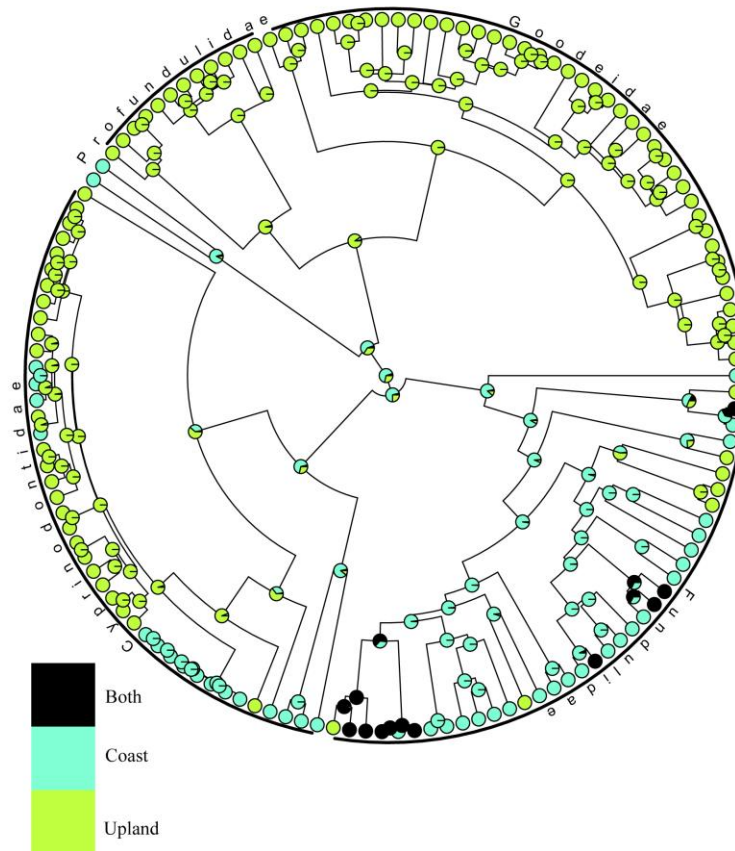

#### SUPPORTING INFORMATION .

Additional Supporting Information may be found in the online version of this article at the publisher's web-site.

**Table S1** GenBank accession numbers for 139 species used in phylogenetic analyses. One hundred and thirty five species in the ingroup and four species in the outgroup.

**Table S2** Habitat classification by species. Species assigned to habitat (Upland, Coast and Both) for ancestral habitat reconstruction analysis.

**Table S3** Ancestral area reconstruction models. Models tested in BioGeoBEARS, implemented in RASP. The best-fit model showed in bold and highlighted in green.

**File S1** Molecular data sequence alignment, including two nuclear genes (RAG1, Glyt) and three mitochondrial genes (Cytb, COI and ND2).
